# Supplementary material for: Emission enhancement and high sensitivity of a π-conjugated dye towards pressure: the synergistic effect of supramolecular interactions and H-aggregation
Source: Royal Society of Chemistry journal article supplement (doi:10.1039/c9cc00978g), 2019-01-01
Supplement: c9cc00978g1.pdf [file c9cc00978g1.pdf]

## **Emission Enhancement and High Sensitivity of $\pi$ -Conjugated Dye toward Pressure: Synergistic Effects of Charge-Transfer Excited State and H-Aggregation**

Zhanghua Sun,<sup>a,b†</sup> Qiguang Zang,<sup>b†</sup> Qing Luo,<sup>a</sup> Chunyang Lv,<sup>b</sup> Feng Cao,<sup>b</sup> Qingbao Song,<sup>\*a</sup> Ruiyang Zhao,<sup>c</sup> Yujian Zhang,<sup>\*b</sup> and Wai-Yeung Wong<sup>\*d</sup>

<sup>a</sup> College of Chemical Engineering, Zhejiang University of Technology, Caowang Road No. 18, Hangzhou 310000, P. R. China,  
E-mail: [qbsong@zjut.edu.cn](mailto:qbsong@zjut.edu.cn)

<sup>b</sup> Department of Materials Chemistry, Huzhou University, East 2nd Ring Rd. No.759, Huzhou, 313000, P. R. China.  
E-mail: [sciencezyj@foxmail.com](mailto:sciencezyj@foxmail.com)

<sup>c</sup> College of Chemical Engineering, Qingdao University of Science and Technology, Qingdao, 266042, P. R. China.

<sup>d</sup> Department of Applied Biology and Chemical Technology, The Hong Kong Polytechnic University, Hung Hom, Hong Kong, P.R. China.  
E-mail: [wai-yeung.wong@polyu.edu.hk](mailto:wai-yeung.wong@polyu.edu.hk)

† The authors contributed equally to this manuscript.

## Experimental section

**Materials:** 4-(Diphenylamino)phenylboronic acid, 7-bromobenzo[c][1,2,5]thiazole-4-carbaldehyde and 3,5-dimethoxyphenylacetonitrile were purchased from Alfa Aesar Co. Ltd. Other reagents were obtained from Sigma-Aldrich or Aladdin Chemicals and used without further purification. Solvents were purified according to standard laboratory methods.

**Instrumentation:**  $^1\text{H}$  NMR and  $^{13}\text{C}$  NMR of triazole derivatives were recorded on a Bruker AM500 spectrometer using tetramethylsilane (TMS,  $\delta=0$  ppm) as internal standard. The time-resolved PL decay spectra of the samples were also performed on an Edinburgh FLS980 fluorescence spectrometer at room temperature. PL measurements at room temperature were obtained on a SENS-9000 (Gilden Photonics, England). The digital photographs were captured by the 550D digital cameras (Canon, Japan). Absolute PL quantum yields ( $\Phi_{\text{PL}}$ ) were determined with a spectrometer C11347 (Hamamatsu, Japan). Powder X-ray diffraction experiments were measured on a Philips X'Pert Pro diffractometer (Netherlands). Measurements were made in a  $2\theta$  range of  $5-50^\circ$  at room temperature with a step of  $0.02^\circ$  ( $2\theta$ ). The scan speed was 2 degree/min. The UV-vis absorption spectra were obtained on a Shimadzu UV-2600 spectrophotometer (Japan).

**Theoretical calculations:** The geometries of all molecules were fully optimized at the SCF level of theory using the Gaussian 09<sup>6</sup> suite of programs package. The ground state geometries have been optimized by using density functional theory (DFT) at B3LYP/6-31G\* level.

### Scheme S1 Synthetic routes of BTZA

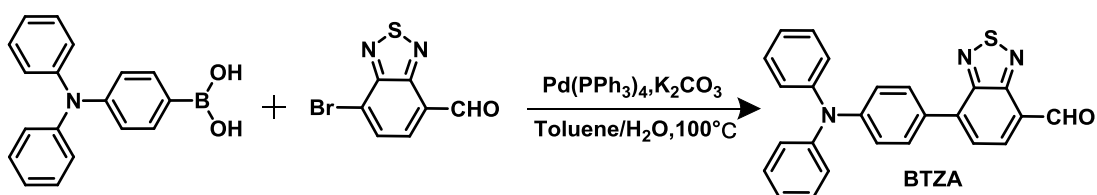

Under an atmosphere of nitrogen, to a mixture of 4-(diphenylamino)phenylboronic acid (6.2 mmol, 1.8 g), 7-bromobenzo[c][1,2,5]thiadiazole-4-carbaldehyde (6 mmol, 1.3 g) and Pd(PPh<sub>3</sub>)<sub>4</sub> (0.22 mmol, 0.25 g) in THF/Toluene (30 mL/50 mL) was added a solution of K<sub>2</sub>CO<sub>3</sub> (2.0 M, 1.5 mL) in water, the reaction solution was refluxed overnight. Then the reaction mixture was poured into water, extracted with CH<sub>2</sub>Cl<sub>2</sub> and dried over anhydrous Mg<sub>2</sub>SO<sub>4</sub>. The crude product was purified by column chromatography on silica gel (petroleum ether/DCM = 2/1) to yield **BTZA** (1.8 g, 75%).

<sup>1</sup>H NMR (400 MHz, CDCl<sub>3</sub>) δ 10.62 (s, 1H), 9.32 (d, *J* = 7.2 Hz, 1H), 9.04-9.02 (*m*, 3H), 7.39 (t, *J* = 8 Hz, 4H), 7.15 (t, *J* = 8 Hz, 6H), 7.08 (d, *J* = 8.8 Hz, 2H)

<sup>13</sup>C NMR (CDCl<sub>3</sub>) δ 188.8, 154.0, 153.9, 149.4, 147.0, 139.9, 132.9, 130.5, 129.5, 129.1, 125.7, 125.6, 125.4, 124.0, 121.9

MS (Maldi-Tof, *m/z*) Calculated for C<sub>35</sub>H<sub>26</sub>N<sub>4</sub>O<sub>2</sub>S = 407.49, found [M<sup>+</sup>] = 406.73

### Scheme S2 Synthetic routes of BTA-DMeO

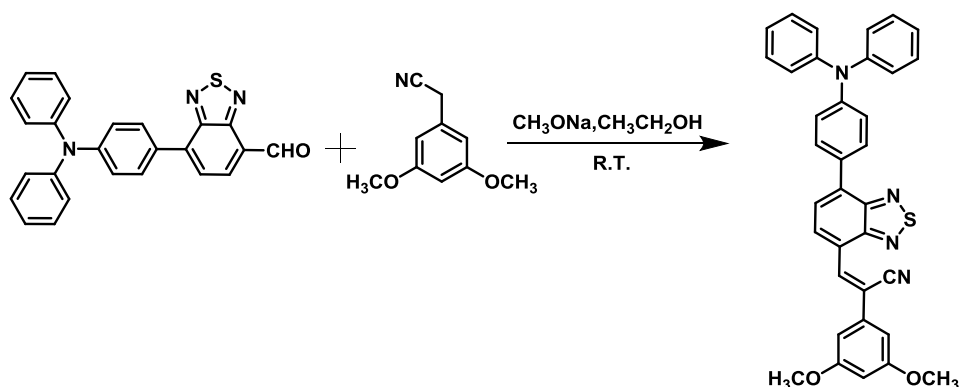

The mixture of **BTZA** (0.82 g, 2 mmol) and 3,5-dimethoxyphenylacetonitrile (0.39 g, 2.2 mmol) in ethanol (HPLC, 40 ml) was stirred at the room temperature for 5 min. Then, a spot of NaOMe were added, and stirred for 5 h. The resulting dye (**BTA-DMeO**) was filtered and repeatedly washed with EtOH solution to give a red powder (0.95g, 82%).

<sup>1</sup>H NMR (400 MHz, CDCl<sub>3</sub>) δ 8.71 (d, *J* = 7.6 Hz, 1H), 8.53 (s, 1H), 7.93 (d, *J* = 8 Hz, 2H), 7.83 (s, 1H), 7.31 (t, *J* = 7.6 Hz, 4H), 7.20 (d, *J* = 6 Hz, 6H), 7.09 (s, 2H), 6.95 (d, *J* = 2 Hz, 2H), 6.54 (t, *J* = 2 Hz, 1H), 3.89 (s, 6H)

<sup>13</sup>C NMR (CDCl<sub>3</sub>) δ 161.5, 154.0, 153.4, 147.5, 145.9, 144.8, 136.3, 135.3, 129.6, 128.8, 127.8, 127.2, 126.9, 125.7, 123.2, 119.07, 118.8, 102.8, 99.6, 55.8

MS (Maldi-Tof, *m/z*) Calculated for C<sub>35</sub>H<sub>26</sub>N<sub>4</sub>O<sub>2</sub>S = 566.68, found [M<sup>+</sup>] = 565.78,

### Scheme S3 Synthetic routes of BTA-MeO

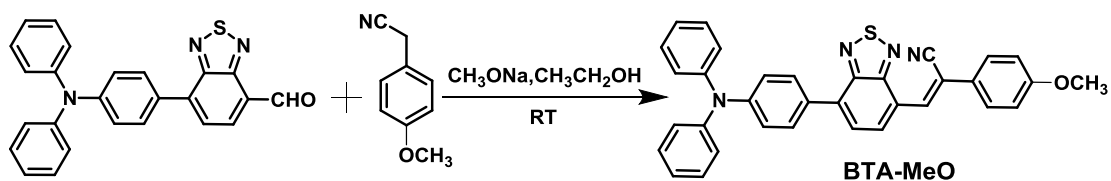

The mixture of **BTZA** (0.3 g, 0.8 mmol) and 4-Methoxyphenylacetonitrile (0.12 g, 0.82 mmol) in ethanol (HPLC, 40 ml) was stirred at the room temperature for 5 min. Then, a spot of NaOMe were added, and stirred for 10 h. The resulting dye (**BTA-MeO**) was filtered and repeatedly washed with EtOH solution to give a red powder (**BTA-MeO**) (0.32 g, 82.5%).

<sup>1</sup>H NMR (400 MHz, CDCl<sub>3</sub>) δ 8.67 (d, *J* = 8 Hz, 1H), 8.42 (s, 1H), 7.91 (d, *J* = 8.8 Hz, 2H), 7.81 (d, *J* = 7.6 Hz, 1H), 7.76 (d, *J* = 8.8 Hz, 2H), 7.31 (t, *J* = 7.6 Hz, 4H), 7.22-7.19 (*m*, 6H), 7.09 (t, *J* = 7.2 Hz, 2H), 7.01 (d, *J* = 8.8 Hz, 2H), 3.88 (s, 3H)

<sup>13</sup>C NMR (CDCl<sub>3</sub>) δ 160.8, 155.1, 153.2, 148.7, 147.3, 135.2, 133.3, 130.1, 129.9, 129.4, 127.7, 127.6, 126.9, 126.8, 125.2, 123.6, 122.4, 118.3, 114.6, 112.3, 55.5

MS (Maldi-Tof, *m/z*) Calculated for C<sub>34</sub>H<sub>24</sub>N<sub>4</sub>OS = 536.65, found [*M*<sup>+</sup>] = 535.78,

**Table S1. Crystal data and structure refinement for crystals BZA-DMeO and BZA-MeO**

| Samples                                            | <b>BTA-DMeO<br/>(CCDC: 1902104)</b>                             | <b>BTA-MeO<br/>(CCDC: 1902106)</b>                |
|----------------------------------------------------|-----------------------------------------------------------------|---------------------------------------------------|
| Formula                                            | C <sub>35</sub> H <sub>26</sub> N <sub>4</sub> O <sub>2</sub> S | C <sub>34</sub> H <sub>24</sub> N <sub>4</sub> OS |
| <i>Mr</i>                                          | 566.68                                                          | 536.65                                            |
| Temperature (K)                                    | 100                                                             | 150                                               |
| Crystal system                                     | Triclinic                                                       | Monoclinic                                        |
| Space group                                        | P-1                                                             | P21/c                                             |
| <i>a</i> (Å)                                       | 7.25705(16)                                                     | 17.3663(9)                                        |
| <i>b</i> (Å)                                       | 9.16553(18)                                                     | 15.3052(5)                                        |
| <i>c</i> (Å)                                       | 22.3109(4)                                                      | 10.2855(5)                                        |
| <i>α</i> (°)                                       | 82.6200(15)                                                     | 90                                                |
| <i>β</i> (°)                                       | 86.5593(16)                                                     | 105.704(5)                                        |
| <i>γ</i> (°)                                       | 70.244(2)                                                       | 90                                                |
| <i>V</i> (Å <sup>3</sup> )                         | 1384.87(5)                                                      | 2631.8(2)                                         |
| <i>Z</i>                                           | 2                                                               | 4                                                 |
| <i>D</i> <sub>calc</sub> (mg/m <sup>3</sup> )      | 1.364                                                           | 1.359                                             |
| Theta Range (°)                                    | 3.996 - 67.080                                                  | 3.910 - 73.224                                    |
| F (000)                                            | 596.0                                                           | 1128                                              |
| <i>h, k, l</i> <sub>max</sub>                      | 5, 10, 26                                                       | 21, 16, 6                                         |
| N <sub>ref</sub>                                   | 11937                                                           | 14050                                             |
| <i>T</i> <sub>min</sub> , <i>T</i> <sub>max</sub>  | 0.949, 1.00                                                     | 0.826, 1.00                                       |
| Independent reflections                            | 4865                                                            | 5184                                              |
| Goodness-of-fit on F <sup>2</sup>                  | 1.054                                                           | 1.090                                             |
| <i>R</i> <sub>int</sub>                            | 0.0258                                                          | 0.0427                                            |
| <i>R</i> <sub>1</sub> [ <i>I</i> >2σ( <i>I</i> )]  | 0.0341                                                          | 0.0814                                            |
| <i>wR</i> <sub>2</sub> [ <i>I</i> >2σ( <i>I</i> )] | 0.0888                                                          | 0.2318                                            |
| <i>R</i> <sub>1</sub> (all data)                   | 0.0368                                                          | 0.0959                                            |
| <i>wR</i> <sub>2</sub> (all data)                  | 0.0905                                                          | 0.2398                                            |
| <i>S</i>                                           | 1.054                                                           | 1.090                                             |

$$R_1 = \frac{\sum ||F_o| - |F_c||}{\sum |F_o|}, wR_2 = \left[ \frac{\sum w(F_o^2 - F_c^2)^2}{\sum w(F_o^2)^2} \right]^{1/2}$$

The change in magnitude of the dipole moment between the ground and excited states, that is,  $\Delta\mu = |\mu_e - \mu_g|$  can be estimated using the Lippert–Mataga equation

$$hc(v_a - v_f) = hc(v_a^0 - v_f^0) + \frac{2(\mu_e - \mu_g)^2}{a_0^3} f(\varepsilon, n)$$

Where  $a_0$  is the cavity radius in which the solute resides, estimated to be 6.5 Å.  $\mu_g$  is the ground-state dipole moment, estimated to be 4.54D ( $\omega$ B97X at the basis set level of 6-31G\*\*),  $\mu_e$  is the excited state dipole moment.  $h$  and  $c$  are Planck's constant and the speed of light, respectively, and  $f(\varepsilon, n)$  is the orientation polarizability, defined as

$$f(\varepsilon, n) = \frac{\varepsilon - 1}{2\varepsilon + 1} - \frac{n^2 - 1}{2n^2 + 1}$$

Where  $\varepsilon$  is the static dielectric constant and  $n$  is the optical refractivity index of the solvent. Through the analysis of the fitted line in low-polarity solvents, its corresponding  $\mu_e$  was calculated to be 10.9 D with the slope of 4366 according to Lippert-Mataga equation. However, in high-polarity solvents, the  $\mu_e$  was increased to 22.8 D with the slope of 24318.

**Table S2** Detailed photophysical data of **BTA-DMeO** in the different solvents

| Solvents        | $f$    | $\lambda_{\text{abs}}$<br>nm | $\lambda_{\text{flu}}$<br>nm | $\nu_a$<br>$\text{cm}^{-1}$ | $\nu_f$<br>$\text{cm}^{-1}$ | $\nu_a - \nu_f$<br>$\text{cm}^{-1}$ | $\Phi_{\text{PL}}$ |
|-----------------|--------|------------------------------|------------------------------|-----------------------------|-----------------------------|-------------------------------------|--------------------|
| Hexane          | 0.0012 | 485                          | 576                          | $2.06 \times 10^4$          | $1.74 \times 10^4$          | $3.2 \times 10^3$                   | 92.4%              |
| Toluene         | 0.014  | 492                          | 623                          | $2.03 \times 10^4$          | $1.61 \times 10^4$          | $4.2 \times 10^3$                   | 88.9%              |
| Butyl ether     | 0.096  | 489                          | 617                          | $2.04 \times 10^4$          | $1.62 \times 10^4$          | $4.2 \times 10^3$                   | 89.4%              |
| Isopropyl ether | 0.145  | 487                          | 630                          | $2.05 \times 10^4$          | $1.59 \times 10^4$          | $4.6 \times 10^3$                   | 85.2%              |
| Ethyl ether     | 0.167  | 485                          | 643                          | $2.06 \times 10^4$          | $1.56 \times 10^4$          | $5.0 \times 10^3$                   | 84.2%              |
| THF             | 0.210  | 484                          | 687                          | $2.07 \times 10^4$          | $1.46 \times 10^4$          | $6.1 \times 10^3$                   | 49.3%              |
| DCM             | 0.217  | 486                          | 700                          | $2.06 \times 10^4$          | $1.43 \times 10^4$          | $6.3 \times 10^3$                   | 49.4%              |
| DMF             | 0.276  | 482                          | 767                          | $2.07 \times 10^4$          | $1.30 \times 10^4$          | $7.7 \times 10^3$                   | 1.5%               |
| Acetonitrile    | 0.305  | 469                          | 771                          | $2.13 \times 10^4$          | $1.30 \times 10^4$          | $8.3 \times 10^3$                   | 1.4%               |

**Table S3** The photophysical properties of **BTA-DMeO** in different states

| Samples          | $\lambda_{em}$<br>[nm] | $\Phi_{PL}$ | $\langle\tau\rangle$<br>[ns] | $k_r$<br>[s <sup>-1</sup> ] | $k_{nr}$<br>[s <sup>-1</sup> ] |
|------------------|------------------------|-------------|------------------------------|-----------------------------|--------------------------------|
| Dye-doped film   | 604                    | 76.9%       | 2.8                          | $2.7 \times 10^8$           | $2.3 \times 10^8$              |
| Spin-coated film | 687                    | 29.3%       | 5.1                          | $5.7 \times 10^7$           | $1.4 \times 10^8$              |

$\langle\tau\rangle = \sum A_j \tau_j^2 / \sum A_j \tau_j$ ,  $j=1, 2, 3, \dots$ ,  $k_r = \eta_{PL} / \langle\tau\rangle$ , and  $k_{nr} = (1 - \eta_{PL}) / \langle\tau\rangle$  where  $\langle\tau\rangle$  is the fluorescence lifetime,  $\Phi_{PL}$  is the PL quantum yield.

**Table S4** PL wavelengths ( $\lambda_{max}$ ), PL lifetime, and PLQY of **BTA-DMeO** and **BTA-MeO**

| Samples         |               | $\lambda_{max}$<br>[nm] | $\langle\tau\rangle$<br>[ns] | $\Phi_{PL}$ | $k_r$<br>[s <sup>-1</sup> ] |
|-----------------|---------------|-------------------------|------------------------------|-------------|-----------------------------|
| <b>BTA-DMeO</b> | <b>1 atm</b>  | 657                     | 7.0                          | 9%          | $1.3 \times 10^7$           |
|                 | <b>20 MPa</b> | 695                     | 5.3                          | 19.3        | $3.6 \times 10^7$           |
| <b>BTA-MeO</b>  | <b>1 atm</b>  | 683                     | 3.7                          | 45.9%       | $1.2 \times 10^8$           |
|                 | <b>20 MPa</b> | 699                     | 4.5                          | 43.6%       | $9.7 \times 10^7$           |

$\langle\tau\rangle = \sum A_j \tau_j^2 / \sum A_j \tau_j$ ,  $j=1, 2, 3, \dots$ ,  $\Phi_{PL} = \langle\tau\rangle \times k_r$ , where  $\langle\tau\rangle$  is the fluorescence lifetime,  $\Phi_{PL}$  is the PL quantum yield

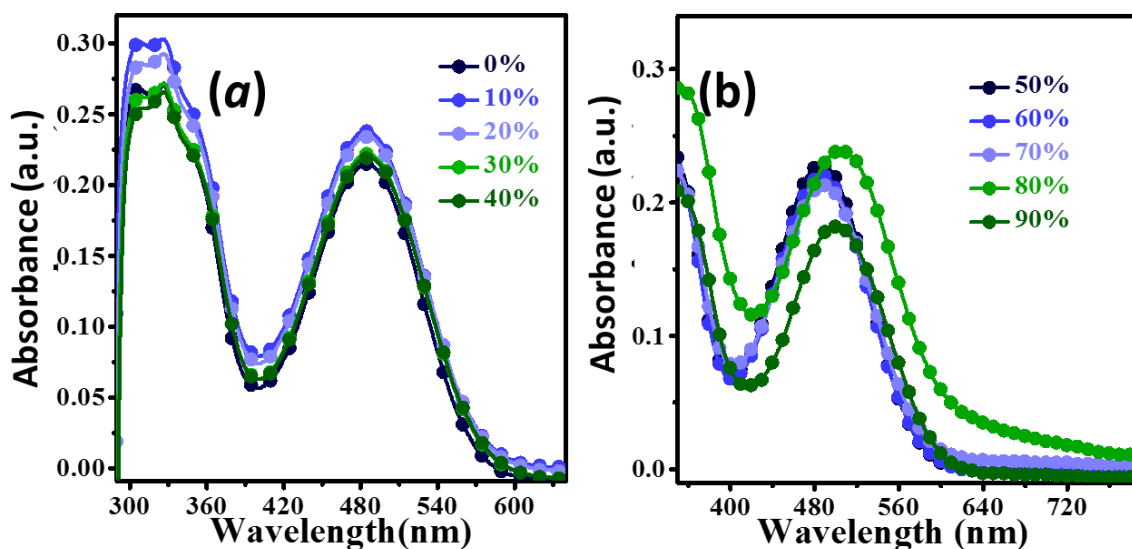

**Figure S1** The UV absorption spectra of **BTA-DMeO**, measured in the different solvents with increasing polarity (the orientational polarizability of solvent,  $\Delta f$ , –hexane: 0.0012; toluene: 0.014; butyl ether: 0.096; Isopropyl ether (IPE): 0.145; ethyl ether: 0.167; tetrahydrofuran (THF): 0.210; methylene chloride (DCM): 0.217; N,N-dimethylformamide (DMF): 0.276; and acetonitrile (ACN): 0.305 (**Table S1**, Supporting Information))

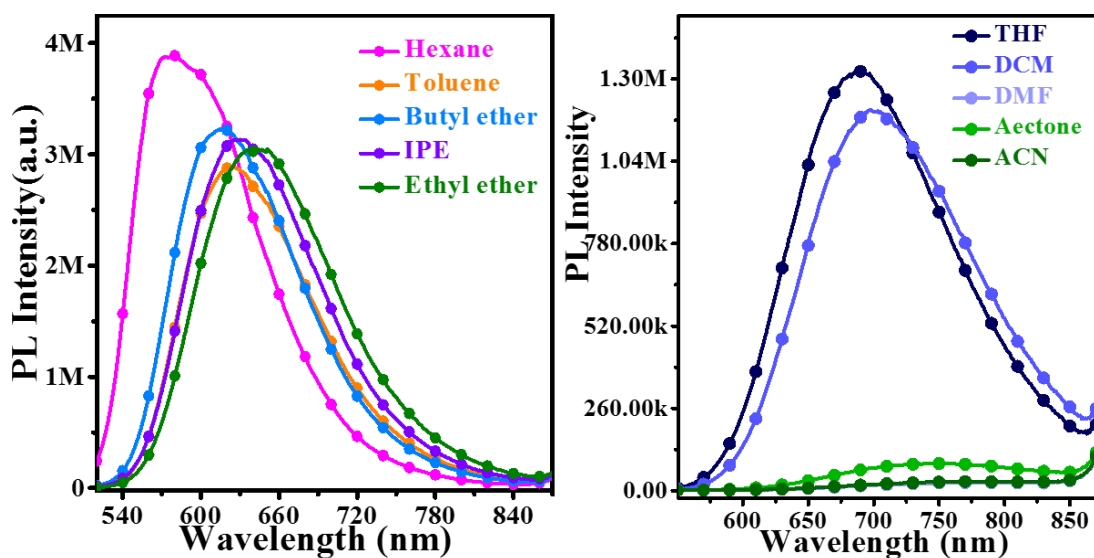

**Figure S2** The PL spectra of **BTA-DMeO** in different solvents (10  $\mu\text{M}$ , isopropyl ether (IPE), tetrahydrofuran (THF), N,N-dimethylformamide (DMF), Acetonitrile (ACN) and methylene chloride (DCM)). The excitation wavelength is 500 nm.



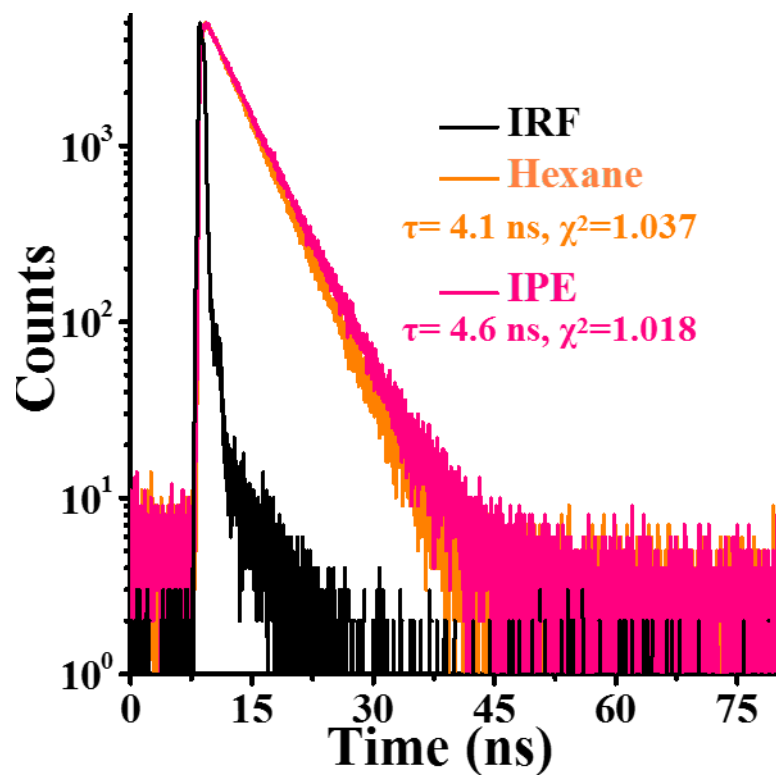

Figure S3 PL lifetime of BTA-DMeO in hexane and IPE (10  $\mu$ M), respectively.

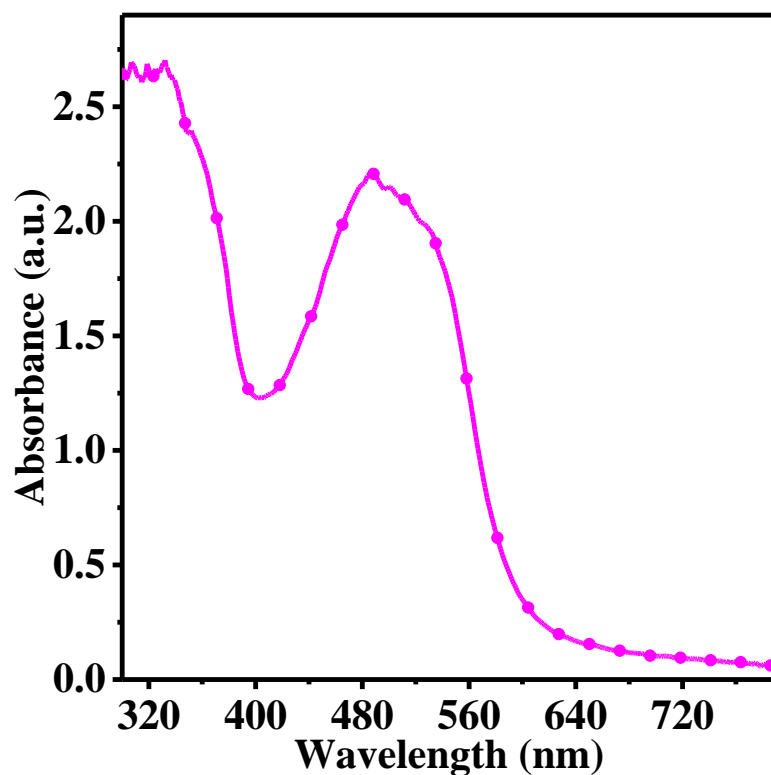

Figure S4 UV-vis absorption spectra of BTA-DMeO in the PMMA film.

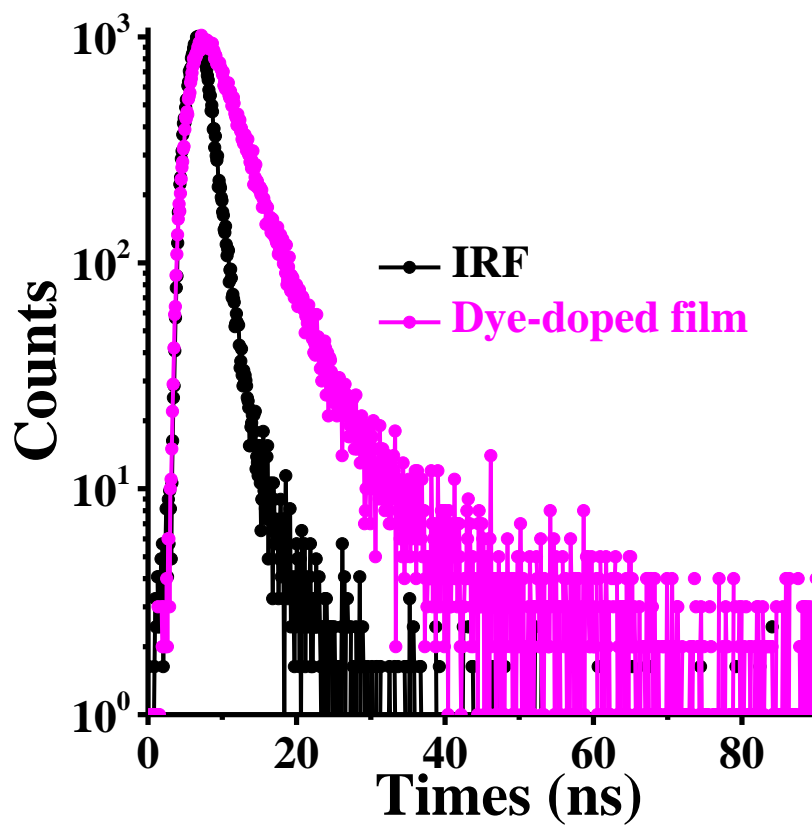

Figure S5 PL lifetime of BTA-DMeO in PMMA film.

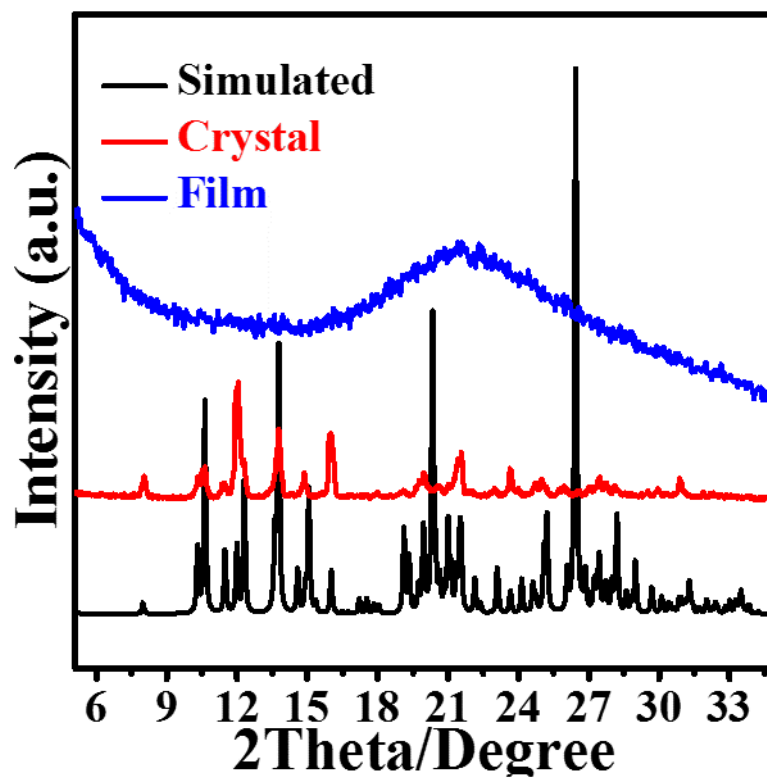

Figure S6 XRD profiles of BTA-DMeO in different states;

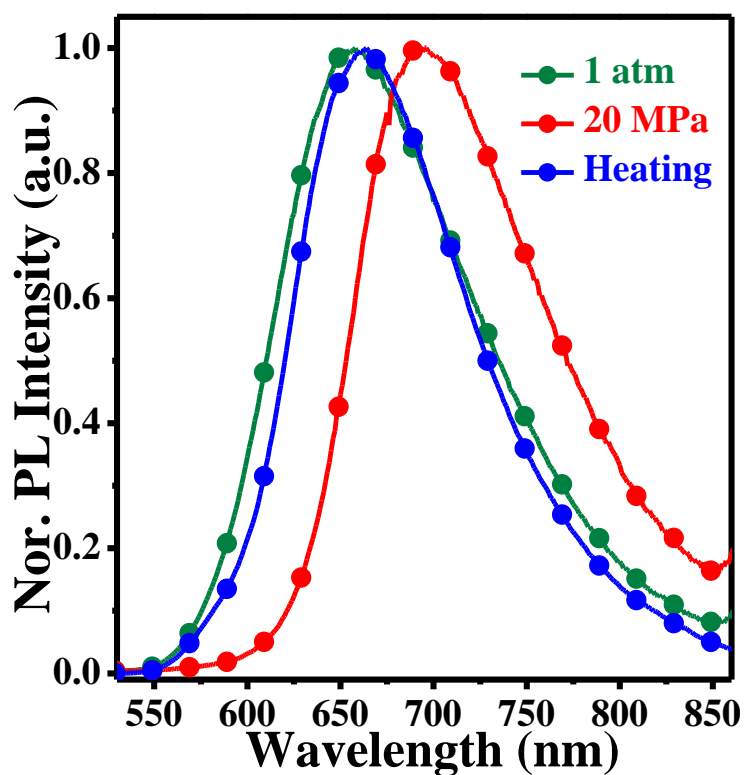

Figure S7 PL spectra of BTA-DMeO solid in different states.

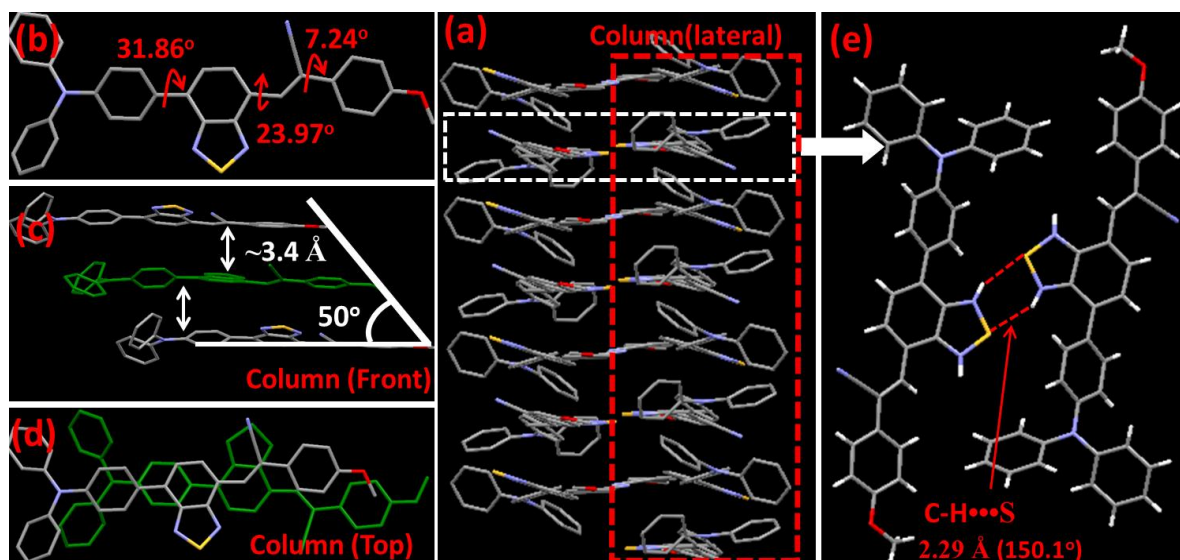

Figure S8 Crystal structures of BTA-MeO: (a) Lateral view of the column arrangement; (b) the dihedral angles of the BTA-MeO single-crystal; (c) front view of the anti-parallel arrangement along the long molecular axis (3.34 Å); (d) top view of the BTA-MeO dimer; (e) and illustration of the C-H...S hydrogen bond interactions.

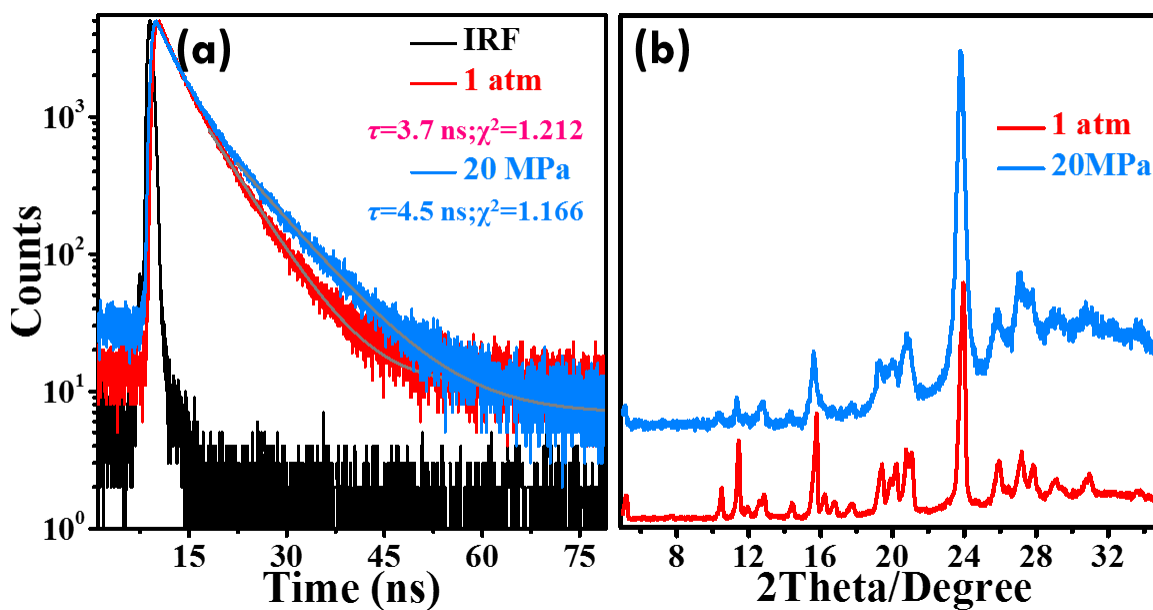

Figure S9 PL lifetime (a) and XRD profiles (b) of BTA-MeO in different states;

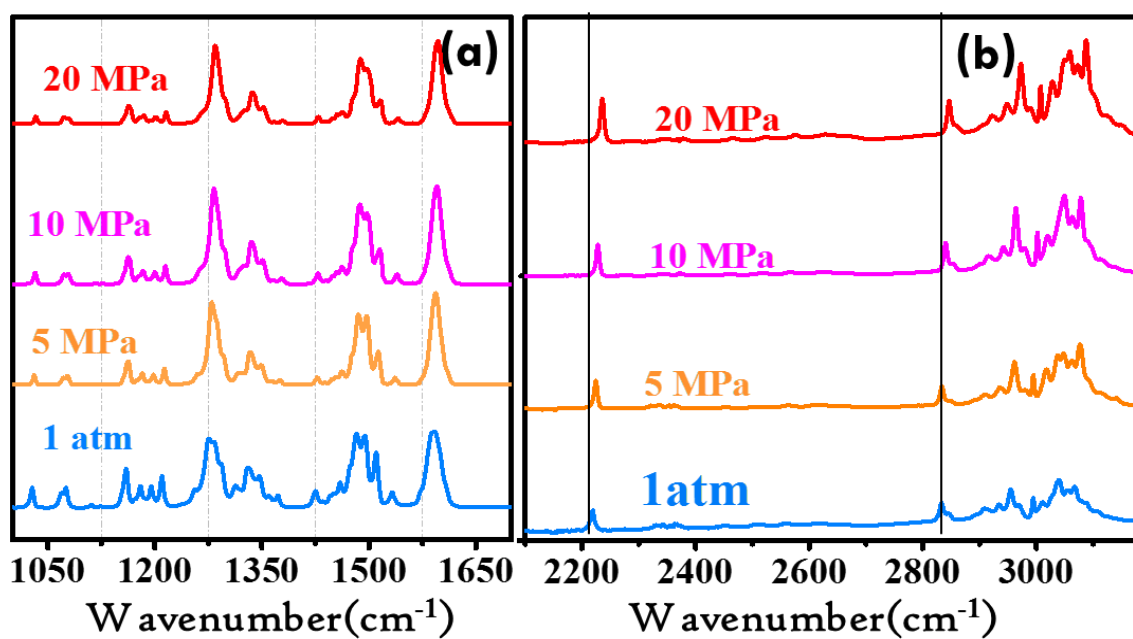

Figure S10 IR spectra of BTA-DMeO crystals in the range of 1000–3200  $\text{cm}^{-1}$  at various pressures from 1 atm to 20 MPa.

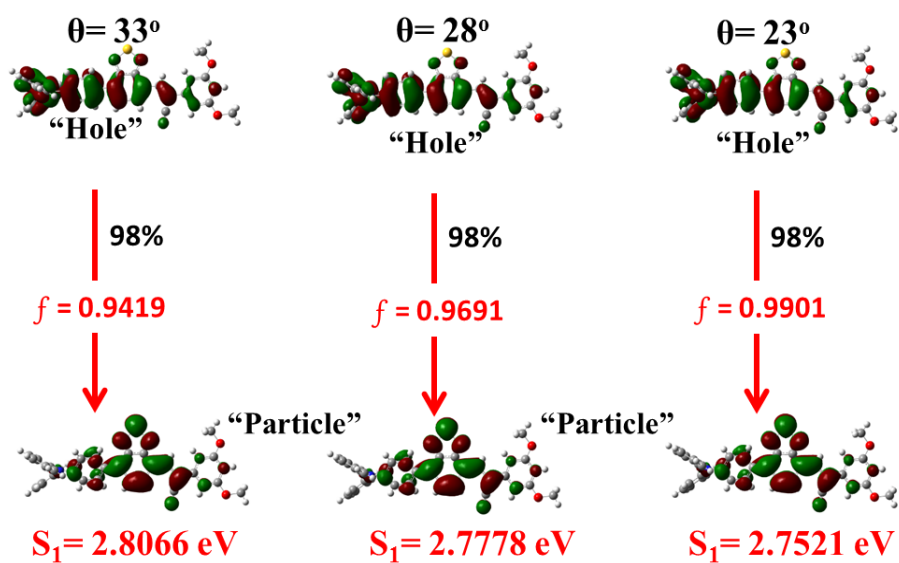

**Figure S11** Excitation energies of different **BTA-DMeO** molecular conformations with different dihedral angles ( $\theta_i$ ). The calculations were carried out using the TD/ M06-2X/6-31g (d,p) method, and  $f$  is the oscillator strength.
